# Supplementary material for: A division-of-labor mode contributes to the cardioprotective potential of mesenchymal stem/stromal cells in heart failure post myocardial infarction
Source: Front Immunol. 2024 Mar 18;15:1363517. doi: 10.3389/fimmu.2024.1363517 (PMC10982400; doi:10.3389/fimmu.2024.1363517)
Supplement: Supplementary Table 1 — Machine learning identified key ligands and the corresponding receptors collected from cellchat package. [file Table_1.xlsx]

## Sheet: Sheet 1
Table S1. Machine learning identified key ligands and the corresponding receptors collected from cellchat package.
LR	interaction_name	pathway_name	ligand	receptor	agonist	antagonist	co_A_receptor	co_I_receptor	evidence	annotation	interaction_name_2
AREG_EGFR	AREG_EGFR	EGF	AREG	EGFR					KEGG: hsa04012	Secreted Signaling	AREG - EGFR
AREG_EGFR_ERBB2	AREG_EGFR_ERBB2	EGF	AREG	EGFR_ERBB2					KEGG: hsa04012	Secreted Signaling	AREG - (EGFR+ERBB2)
VEGFC_VEGFR3	VEGFC_VEGFR3	VEGF	VEGFC	FLT4					KEGG: hsa04370; PMID: 16633338	Secreted Signaling	VEGFC - VEGFR3
VEGFC_VEGFR2	VEGFC_VEGFR2	VEGF	VEGFC	KDR			VEGF activation receptor		KEGG: hsa04370; PMID: 16633338	Secreted Signaling	VEGFC - VEGFR2
VEGFC_VEGFR2R3	VEGFC_VEGFR2R3	VEGF	VEGFC	FLT4_KDR			VEGF activation receptor		PMID: 16633338	Secreted Signaling	VEGFC - VEGFR2R3
CCL20_CCR6	CCL20_CCR6	CCL	CCL20	CCR6					KEGG: hsa04060	Secreted Signaling	CCL20 - CCR6
ANGPTL4_ITGA5_ITGB1	ANGPTL4_ITGA5_ITGB1	ANGPTL	ANGPTL4	ITGA5_ITGB1					PMID: 30049845	Secreted Signaling	ANGPTL4 - (ITGA5+ITGB1)
ANGPTL4_ITGAV_ITGB3	ANGPTL4_ITGAV_ITGB3	ANGPTL	ANGPTL4	ITGAV_ITGB3					PMID: 30049845	Secreted Signaling	ANGPTL4 - (ITGAV+ITGB3)
ANGPTL4_CDH5	ANGPTL4_CDH5	ANGPTL	ANGPTL4	CDH5					PMID: 30049845	Secreted Signaling	ANGPTL4 - CDH5
ANGPTL4_CDH11	ANGPTL4_CDH11	ANGPTL	ANGPTL4	CDH11					PMID: 30049845	Secreted Signaling	ANGPTL4 - CDH11
ANGPTL4_SDC1	ANGPTL4_SDC1	ANGPTL	ANGPTL4	SDC1					PMID: 29017031	Secreted Signaling	ANGPTL4 - SDC1
ANGPTL4_SDC2	ANGPTL4_SDC2	ANGPTL	ANGPTL4	SDC2					PMID: 29017031	Secreted Signaling	ANGPTL4 - SDC2
ANGPTL4_SDC3	ANGPTL4_SDC3	ANGPTL	ANGPTL4	SDC3					PMID: 29017031	Secreted Signaling	ANGPTL4 - SDC3
ANGPTL4_SDC4	ANGPTL4_SDC4	ANGPTL	ANGPTL4	SDC4					PMID: 29017031	Secreted Signaling	ANGPTL4 - SDC4
BDNF_NTRK2	BDNF_NTRK2	NT	BDNF	NTRK2			NGFR activation receptor		PMID: 27908981	Secreted Signaling	BDNF - NTRK2
SEMA3C_NRP1_PLXNA1	SEMA3C_NRP1_PLXNA1	SEMA3	SEMA3C	NRP1_PLXNA1					PMID: 27533782	Secreted Signaling	SEMA3C - (NRP1+PLXNA1)
SEMA3C_NRP1_PLXNA2	SEMA3C_NRP1_PLXNA2	SEMA3	SEMA3C	NRP1_PLXNA2					PMID: 27533782	Secreted Signaling	SEMA3C - (NRP1+PLXNA2)
SEMA3C_NRP1_PLXNA3	SEMA3C_NRP1_PLXNA3	SEMA3	SEMA3C	NRP1_PLXNA3					PMID: 27533782	Secreted Signaling	SEMA3C - (NRP1+PLXNA3)
SEMA3C_NRP1_PLXNA4	SEMA3C_NRP1_PLXNA4	SEMA3	SEMA3C	NRP1_PLXNA4					PMID: 27533782	Secreted Signaling	SEMA3C - (NRP1+PLXNA4)
SEMA3C_NRP2_PLXNA1	SEMA3C_NRP2_PLXNA1	SEMA3	SEMA3C	NRP2_PLXNA1					PMID: 27533782	Secreted Signaling	SEMA3C - (NRP2+PLXNA1)
SEMA3C_NRP2_PLXNA2	SEMA3C_NRP2_PLXNA2	SEMA3	SEMA3C	NRP2_PLXNA2					PMID: 27533782	Secreted Signaling	SEMA3C - (NRP2+PLXNA2)
SEMA3C_NRP2_PLXNA3	SEMA3C_NRP2_PLXNA3	SEMA3	SEMA3C	NRP2_PLXNA3					PMID: 27533782	Secreted Signaling	SEMA3C - (NRP2+PLXNA3)
SEMA3C_NRP2_PLXNA4	SEMA3C_NRP2_PLXNA4	SEMA3	SEMA3C	NRP2_PLXNA4					PMID: 27533782	Secreted Signaling	SEMA3C - (NRP2+PLXNA4)
SEMA3C_NRP1_NRP2	SEMA3C_NRP1_NRP2	SEMA3	SEMA3C	NRP1_NRP2					PMID: 27533782	Secreted Signaling	SEMA3C - (NRP1+NRP2)
SEMA3C_PLXND1	SEMA3C_PLXND1	SEMA3	SEMA3C	PLXND1					PMID: 27533782	Secreted Signaling	SEMA3C - PLXND1
PSAP_GPR37L1	PSAP_GPR37L1	PSAP	PSAP	GPR37L1					PMID: 23690594	Secreted Signaling	PSAP - GPR37L1
PSAP_GPR37	PSAP_GPR37	PSAP	PSAP	GPR37					PMID: 23690594	Secreted Signaling	PSAP - GPR37
COL4A1_ITGA1_ITGB1	COL4A1_ITGA1_ITGB1	COLLAGEN	COL4A1	ITGA1_ITGB1					KEGG: hsa04512	ECM-Receptor	COL4A1 - (ITGA1+ITGB1)
COL4A1_ITGA2_ITGB1	COL4A1_ITGA2_ITGB1	COLLAGEN	COL4A1	ITGA2_ITGB1					KEGG: hsa04512	ECM-Receptor	COL4A1 - (ITGA2+ITGB1)
FN1_ITGA3_ITGB1	FN1_ITGA3_ITGB1	FN1	FN1	ITGA3_ITGB1					KEGG: hsa04512	ECM-Receptor	FN1 - (ITGA3+ITGB1)
FN1_ITGA4_ITGB1	FN1_ITGA4_ITGB1	FN1	FN1	ITGA4_ITGB1					KEGG: hsa04512	ECM-Receptor	FN1 - (ITGA4+ITGB1)
FN1_ITGA5_ITGB1	FN1_ITGA5_ITGB1	FN1	FN1	ITGA5_ITGB1					KEGG: hsa04512	ECM-Receptor	FN1 - (ITGA5+ITGB1)
FN1_ITGA8_ITGB1	FN1_ITGA8_ITGB1	FN1	FN1	ITGA8_ITGB1					KEGG: hsa04512	ECM-Receptor	FN1 - (ITGA8+ITGB1)
THBS1_ITGA3_ITGB1	THBS1_ITGA3_ITGB1	THBS	THBS1	ITGA3_ITGB1					KEGG: hsa04512	ECM-Receptor	THBS1 - (ITGA3+ITGB1)
COL4A1_ITGA3_ITGB1	COL4A1_ITGA3_ITGB1	COLLAGEN	COL4A1	ITGA3_ITGB1					KEGG: hsa04512	ECM-Receptor	COL4A1 - (ITGA3+ITGB1)
COL4A1_ITGA9_ITGB1	COL4A1_ITGA9_ITGB1	COLLAGEN	COL4A1	ITGA9_ITGB1					KEGG: hsa04512	ECM-Receptor	COL4A1 - (ITGA9+ITGB1)
COL4A1_ITGA10_ITGB1	COL4A1_ITGA10_ITGB1	COLLAGEN	COL4A1	ITGA10_ITGB1					KEGG: hsa04512	ECM-Receptor	COL4A1 - (ITGA10+ITGB1)
COL4A1_ITGA11_ITGB1	COL4A1_ITGA11_ITGB1	COLLAGEN	COL4A1	ITGA11_ITGB1					KEGG: hsa04512	ECM-Receptor	COL4A1 - (ITGA11+ITGB1)
FN1_ITGAV_ITGB1	FN1_ITGAV_ITGB1	FN1	FN1	ITGAV_ITGB1					KEGG: hsa04512	ECM-Receptor	FN1 - (ITGAV+ITGB1)
FN1_ITGA4_ITGB7	FN1_ITGA4_ITGB7	FN1	FN1	ITGA4_ITGB7					KEGG: hsa04512	ECM-Receptor	FN1 - (ITGA4+ITGB7)
FN1_ITGAV_ITGB3	FN1_ITGAV_ITGB3	FN1	FN1	ITGAV_ITGB3					KEGG: hsa04512	ECM-Receptor	FN1 - (ITGAV+ITGB3)
THBS1_ITGAV_ITGB3	THBS1_ITGAV_ITGB3	THBS	THBS1	ITGAV_ITGB3					KEGG: hsa04512	ECM-Receptor	THBS1 - (ITGAV+ITGB3)
FN1_ITGA2B_ITGB3	FN1_ITGA2B_ITGB3	FN1	FN1	ITGA2B_ITGB3					KEGG: hsa04512	ECM-Receptor	FN1 - (ITGA2B+ITGB3)
FN1_ITGAV_ITGB6	FN1_ITGAV_ITGB6	FN1	FN1	ITGAV_ITGB6					KEGG: hsa04512	ECM-Receptor	FN1 - (ITGAV+ITGB6)
FN1_ITGAV_ITGB8	FN1_ITGAV_ITGB8	FN1	FN1	ITGAV_ITGB8					KEGG: hsa04512	ECM-Receptor	FN1 - (ITGAV+ITGB8)
COL4A1_ITGAV_ITGB8	COL4A1_ITGAV_ITGB8	COLLAGEN	COL4A1	ITGAV_ITGB8					KEGG: hsa04512	ECM-Receptor	COL4A1 - (ITGAV+ITGB8)
FN1_CD44	FN1_CD44	FN1	FN1	CD44					KEGG: hsa04512	ECM-Receptor	FN1 - CD44
COL4A1_CD44	COL4A1_CD44	COLLAGEN	COL4A1	CD44					KEGG: hsa04512	ECM-Receptor	COL4A1 - CD44
COL4A1_SDC1	COL4A1_SDC1	COLLAGEN	COL4A1	SDC1					KEGG: hsa04512	ECM-Receptor	COL4A1 - SDC1
FN1_SDC1	FN1_SDC1	FN1	FN1	SDC1					KEGG: hsa04512	ECM-Receptor	FN1 - SDC1
THBS1_SDC1	THBS1_SDC1	THBS	THBS1	SDC1					KEGG: hsa04512	ECM-Receptor	THBS1 - SDC1
COL4A1_SDC4	COL4A1_SDC4	COLLAGEN	COL4A1	SDC4					KEGG: hsa04512	ECM-Receptor	COL4A1 - SDC4
FN1_SDC4	FN1_SDC4	FN1	FN1	SDC4					KEGG: hsa04512	ECM-Receptor	FN1 - SDC4
THBS1_SDC4	THBS1_SDC4	THBS	THBS1	SDC4					KEGG: hsa04512	ECM-Receptor	THBS1 - SDC4
THBS1_CD36	THBS1_CD36	THBS	THBS1	CD36					KEGG: hsa04512	ECM-Receptor	THBS1 - CD36
COL4A1_GP6	COL4A1_GP6	COLLAGEN	COL4A1	GP6					KEGG: hsa04512	ECM-Receptor	COL4A1 - GP6
THBS1_CD47	THBS1_CD47	THBS	THBS1	CD47					KEGG: hsa04512	ECM-Receptor	THBS1 - CD47
CD99_PILRA	CD99_PILRA	CD99	CD99	PILRA					PMID: 18234675	Cell-Cell Contact	CD99 - PILRA
CD99_CD99	CD99_CD99	CD99	CD99	CD99					KEGG: hsa04514	Cell-Cell Contact	CD99 - CD99
CD99_CD99L2	CD99_CD99L2	CD99	CD99	CD99L2					KEGG: hsa04514	Cell-Cell Contact	CD99 - CD99L2
THY1_ITGAM_ITGB2	THY1_ITGAM_ITGB2	THY1	THY1	ITGAM_ITGB2					PMID: 15850796	Cell-Cell Contact	THY1 - (ITGAM+ITGB2)
THY1_ITGAX_ITGB2	THY1_ITGAX_ITGB2	THY1	THY1	ITGAX_ITGB2					PMID: 15850796	Cell-Cell Contact	THY1 - (ITGAX+ITGB2)
THY1_ITGAV_ITGB3	THY1_ITGAV_ITGB3	THY1	THY1	ITGAV_ITGB3					PMID: 29212879; PMID: 18346467	Cell-Cell Contact	THY1 - (ITGAV+ITGB3)
